# Supplementary material
Source: PubMed Central journal article supplement (PMC1693945)
Supplement: plntcell_tpc.105.040741_2.pdf [file plntcell_tpc.105.040741_2.pdf]

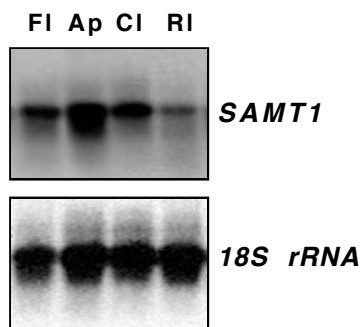

**Supplemental Figure 2.** RNA Gel Blot Analysis of *SAMT1* in Various Tissues.

RNA gel blot analysis was performed using 10  $\mu$ g of total RNA isolated from the indicated part of the *Arabidopsis* plants including the flower (FI), the apex (Ap), the cauline leaves (CI) and the rosette leaves (RI). Blots were hybridized with *SAMT1* probe and *18S rRNA* probe to verify equivalent sample loading.
