# Supplementary material
Source: PubMed Central journal article supplement (PMC1693945)
Supplement: plntcell_tpc.105.040741_3.pdf [file plntcell_tpc.105.040741_3.pdf]

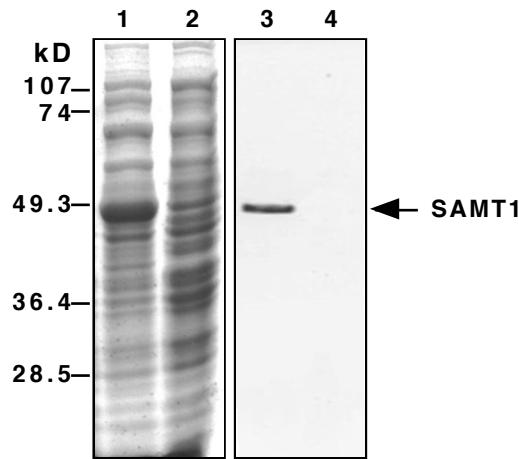

**Supplemental Figure 3.** Expression of Recombinant SAMT1 and Specificity of anti-SAMT1. Truncated *SAMT1* cDNA encoding the mature protein (32 kD) was cloned into the pBAD/TOPO ThioFusion (Invitrogen). The resulting construct was transformed into *E. coli*. Bacterial cells were induced with 0.02% L-arabinose and analysed for their protein constituents by SDS-PAGE and Coomassie blue staining (lane 1, SAMT1-pBAD/TOPO ThioFusion induced cells, lane 2, pBAD/TOPO ThioFusion induced cells). Recombinant SAMT1 produced as a thioredoxin fusion protein was purified and used for antibody production. Recombinant antibodies raised reacted only with a single band (48 kD) corresponding to SAMT1 fusion protein in cell harboring SAMT1-pBAD/TOPO ThioFusion (lane 3) compared to cells harboring pBAD/TOPO ThioFusion (lane 4).
