# Supplementary material
Source: PubMed Central journal article supplement (PMC1693945)
Supplement: plntcell_tpc.105.040741_4.pdf [file plntcell_tpc.105.040741_4.pdf]

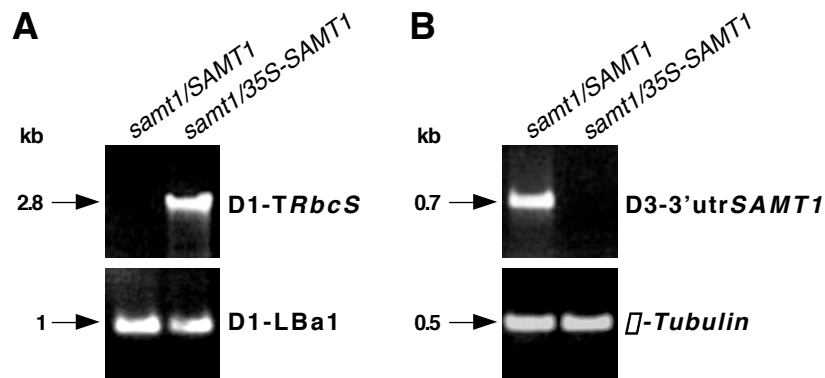

**Supplemental Figure 4.** Functional Complementation of *samt1* with *SAMT1*.

*Samt1* was complemented in an heterozygous background (*samt1/SAMT1*) using a *35SSAMT1* construct.

(A) For detecting the transgene (*35S-SAMT1*) in the complemented lines (*samt1/35S-SAMT1*), the forward primer (D1) and the reverse primer (*TRbcS*) representing a fragment of the pea Rubisco small subunit terminator that is present in the pKYLX71-35S<sub>2</sub> vector, were used for PCR amplification. The *TRbcS* primer hybridizes only to the transgene. The native *samt1* was detected using the forward (D1) and the reverse (left border LBa1) primers.

(B) The absence of native *SAMT1* in the complemented lines (*samt1/35S-SAMT1*) was analyzed by RT-PCR using the forward primer (D3) and the reverse primer (3'untranslated region of *SAMT1* (3'utr *SAMT1*)). The 3'utr *SAMT1* primer is not present in the *35S-SAMT1* transgene. Amplification of  $\alpha$ -*tubulin* mRNA was used as a positive control. PCR was performed for 35 cycles (*SAMT1*) and 27 cycles ( $\alpha$ -*tubulin*). PCR fragments derived from the different primers are indicated. Numbers refer to the lengths of amplified products.
