# Supplementary material
Source: PubMed Central journal article supplement (PMC1693945)
Supplement: plntcell_tpc.105.040741_5.pdf [file plntcell_tpc.105.040741_5.pdf]

**Supplemental Table 1 online.** Expression Data Showing Genes Clustering with *AtSAMT1*.

Arithmetic means of the three independent replicates contained in the AtGenExpress developmental series (Affymetrix ATH1 gene chip; 79 different conditions) were median centered for five consecutive times (rows and columns) and hierarchically clustered using the software Cluster 3.0. The resulting gene tree was visualized using the software Java Treeview (<http://jtreeview.sourceforge.net>) and manually inspected for genes clustering with *AtSAMT1*. The gene/array tree showing an  $r^2$  value of  $> 0.85$  was extracted and the corresponding AGI identifiers and annotations are listed in the table. All corresponding proteins were analyzed for their predicted subcellular localization using TargetP.

| AGI       | TargetP-prediction | Annotation                                                                                                                                                                                                                                                                           |
|-----------|--------------------|--------------------------------------------------------------------------------------------------------------------------------------------------------------------------------------------------------------------------------------------------------------------------------------|
| At5g14220 | other              | protoporphyrinogen oxidase, putative similar to protoporphyrinogen IX oxidase, mitochondrial (PPO II) from <i>Nicotiana tabacum</i> (SPIO24164), <i>Glycine max</i> , AB025102, <i>Spinacia oleracea</i> (GI:14349153); contains Pfam amine oxidase, flavin-containing domain (PF015 |
| At3g62000 | mitochondria       | O-methyltransferase family 3 protein  several O-methyltransferases - different species; contains Pfam 01596 O-methyltransferase domain                                                                                                                                               |
| At5g39790 | mitochondria       | 5'-AMP-activated protein kinase beta-1 subunit-related  contains similarity to Swiss-Prot:P80387 5'-AMP-activated protein kinase, beta-1 subunit (AMPK beta-1 chain) (AMPKb) (40 kDa subunit) (Sus scrofa)                                                                           |
| At5g64816 | chloroplasts       | expressed protein                                                                                                                                                                                                                                                                    |
| At2g48120 | chloroplasts       | pale cress protein (PAC)                                                                                                                                                                                                                                                             |
| At3g18110 | chloroplasts       | pentatricopeptide (PPR) repeat-containing protein  contains Pfam profile: PF01535 PPR repeat                                                                                                                                                                                         |
| At5g19620 | chloroplasts       | outer membrane OMP85 family protein                                                                                                                                                                                                                                                  |
| At5g55280 | chloroplasts       | cell division protein FtsZ, chloroplast, putative (FTSZ)  identical to SPIQ42545 Cell division protein ftsZ homolog, chloroplast precursor { <i>Arabidopsis thaliana</i> }; similar to FtsZ1 ( <i>Tagetes erecta</i> ) GI:8896066; contains Pfam profiles PF00091: Tubulin/FtsZ f    |

|           |              |                                                                                                                                                                                                             |
|-----------|--------------|-------------------------------------------------------------------------------------------------------------------------------------------------------------------------------------------------------------|
| At4g23940 | chloroplasts | FtsH protease, putative contains similarity to zinc dependent protease GI:7650138 from [ <i>Arabidopsis thaliana</i> ]                                                                                      |
| At3g46740 | chloroplasts | chloroplast import-associated channel protein homolog chloroplast import-associated channel IAP75 - <i>Pisum sativum</i> ,PIR2:S55344                                                                       |
| At4g33680 | chloroplasts | aminotransferase class I and II family protein  low similarity to Aromatic Aminotransferase from <i>Pyrococcus horikoshii</i> GI:14278621; contains Pfam profile PF00155 aminotransferase, classes I and II |
| At1g14410 | chloroplasts | DNA-binding protein p24, putative similar to DNA-binding protein p24 GI:9651810 from [ <i>Solanum tuberosum</i> ]; supported by cDNA: gi_13877786_gb_AF370156.1_AF370156                                    |
| At2g39290 | chloroplasts | phosphatidylglycerolphosphate synthase (PGS1)  identical to phosphatidylglycerolphosphate synthase GI:13365519 from ( <i>Arabidopsis thaliana</i> )                                                         |
| At5g19210 | other        | eIF-4AII - like protein EUKARYOTIC INITIATION FACTOR 4A-II (EIF-4A-II), <i>Homo sapiens</i> , SWISSPROT:IF42_HUMAN                                                                                          |
| At4g30720 | chloroplasts | expressed protein  hypothetical protein - <i>Synechocystis sp.</i> (strain PCC 6803),PIR2:S76076                                                                                                            |
| At1g74850 | chloroplasts | hypothetical protein predicted by genscan+                                                                                                                                                                  |
| At3g49470 | other        | alpha NAC-like protein Nascent polypeptide associated complex protein alpha subunit - <i>Drosophila melanogaster</i> , EMBL:AF017783; supported by cDNA: gi_13899100_gb_AF370545.1_AF370545                 |
| At4g32900 | mitochondria | expressed protein                                                                                                                                                                                           |
| At5g23310 | chloroplasts | superoxide dismutase (Fe) / iron superoxide dismutase 3 (FSD3)  identical to iron superoxide dismutase 3 ( <i>Arabidopsis thaliana</i> ) gi 3273757 gb AAC24834                                             |
| At4g34290 | chloroplasts | SWIB complex BAF60b domain-containing protein                                                                                                                                                               |
| At2g44640 | chloroplasts | expressed protein                                                                                                                                                                                           |

|           |              |                                                                                                                                                                                                                                                                          |
|-----------|--------------|--------------------------------------------------------------------------------------------------------------------------------------------------------------------------------------------------------------------------------------------------------------------------|
| At3g04260 | chloroplasts | SAP domain-containing protein                                                                                                                                                                                                                                            |
| At3g54090 | chloroplasts | Putative fructokinase; b3 pfkB-type carbohydrate kinase family proteinl contains Pfam profile: PF00294 carbohydrate kinase                                                                                                                                               |
| At1g69200 | chloroplasts | putative fructokinase; b3 pfkB-type carbohydrate kinase family proteinl contains Pfam profile: PF00294 pfkB family carbohydrate kinase                                                                                                                                   |
| At1g06950 | chloroplasts | The Chloroplast Envelope Anion Channel-forming Tic110 Family                                                                                                                                                                                                             |
| At3g48500 | chloroplasts | expressed proteinl                                                                                                                                                                                                                                                       |
| At2g34640 | chloroplasts | expressed proteinl                                                                                                                                                                                                                                                       |
| At3g16260 | chloroplasts | metallo-beta-lactamase family protein                                                                                                                                                                                                                                    |
| At3g13180 | chloroplasts | NOL1/NOP2/sun family protein / antitermination NusB domain-containing protein                                                                                                                                                                                            |
| At1g10522 | chloroplasts | expressed proteinl                                                                                                                                                                                                                                                       |
| At2g04530 | chloroplasts | RNase Z                                                                                                                                                                                                                                                                  |
| At1g30610 | chloroplasts | pentatricopeptide (PPR) repeat-containing proteinl contains Pfam profile PF01535: PPR repeat                                                                                                                                                                             |
| At1g63680 | chloroplasts | Mur ligase family protein                                                                                                                                                                                                                                                |
| At4g17540 | other        | expressed proteinl                                                                                                                                                                                                                                                       |
| At3g56330 | chloroplasts | N2,N2-dimethylguanosine tRNA methyltransferase family proteinl low similarity to SPIQ9P804 N(2),N(2)-dimethylguanosine tRNA methyltransferase (EC 2.1.1.32) (tRNA(guanine-26,N(2)-N(2)) methyltransferase) { <i>Schizosaccharomyces pombe</i> }; contains Pfam profile P |
| At4g24175 | mitochondria | expressed proteinl                                                                                                                                                                                                                                                       |
| At1g17850 | chloroplasts | expressed proteinl                                                                                                                                                                                                                                                       |
| At2g14660 | other        | expressed proteinl contains Pfam PF04543: Family of unknown function (DUF589); similar to cThy28kD                                                                                                                                                                       |

|           |              |                                                                                                                                                                                                      |
|-----------|--------------|------------------------------------------------------------------------------------------------------------------------------------------------------------------------------------------------------|
|           |              | (GI:995778) ( <i>Gallus gallus</i> ); similar to thymocyte protein mThy28 (GI:23978374) ( <i>Mus musculus</i> )                                                                                      |
| At3g25680 | chloroplasts | expressed protein                                                                                                                                                                                    |
| At5g39980 | chloroplasts | pentatricopeptide (PPR) repeat-containing protein  contains Pfam profile PF01535: PPR repeat                                                                                                         |
| At1g11290 | chloroplasts | pentatricopeptide (PPR) repeat-containing protein  contains Pfam profile PF01535: PPR repeat<br>DEAD box RNA helicase (RH26)  strong similarity to RNA helicase RH26 ( <i>Arabidopsis thaliana</i> ) |
| At5g08610 | chloroplasts | GI:3776025; contains Pfam profiles PF00270: DEAD/DEAH box helicase, PF00271: Helicase conserved C-terminal domain; identical to cDNA DEAD box RNA helicase, RH26 GI                                  |
| At4g31210 | chloroplasts | DNA topoisomerase like- protein <i>Bacillus subtilis</i> DNA Topoisomerase I; PID:G520753                                                                                                            |
| At1g66520 | chloroplasts | formyltransferase, putative  similar to methionyl-tRNA formyltransferase (strain N315- <i>Staphylococcus aureus</i> ) SWISS-PROT:Q99UQ2                                                              |
| At3g21300 | other        | RNA methyltransferase family protein  contains TIGRfam TIGR00479: RNA methyltransferase, TrmA family                                                                                                 |
| At1g79560 | other        | FtsH protease, putative  contains similarity to chloroplast FtsH protease GI:5804782 from [ <i>Nicotiana tabacum</i> ]                                                                               |
| At2g24120 | chloroplasts | DNA-directed RNA polymerase, chloroplast (RPOPT)  identical to SPI024600 DNA-directed RNA polymerase, chloroplast precursor (EC 2.7.7.6) { <i>Arabidopsis thaliana</i> }                             |
| At4g09730 | mitochondria | DEAD/DEAH box helicase, putative  RNA helicase - <i>Mus musculus</i> ,PIR2:I84741                                                                                                                    |
| At2g22870 | mitochondria | expressed protein                                                                                                                                                                                    |
| At3g10270 | other        | putative DNA gyrase subunit B similar to putative DNA gyrase subunit GB:O50627 [ <i>Bacillus halodurans</i> ]                                                                                        |
| At1g48570 | chloroplasts | zinc finger (Ran-binding) family protein  contains Pfam domain, PF00641: Zn-finger in Ran binding protein and others                                                                                 |

|           |              |                                                                                                                                                                                                                                                                          |
|-----------|--------------|--------------------------------------------------------------------------------------------------------------------------------------------------------------------------------------------------------------------------------------------------------------------------|
| At1g59990 | chloroplasts | DEAD/DEAH box helicase, putative (RH22)  similar to RNA helicase GI:3776015 from ( <i>Arabidopsis thaliana</i> ); contains Pfam profiles PF00271: Helicase conserved C-terminal domain, PF00270: DEAD/DEAH box helicase; matches EST OAO811-2                            |
| At2g04030 | chloroplasts | heat shock protein, putative  strong similarity to heat shock protein ( <i>Arabidopsis thaliana</i> ) GI:1906830; contains Pfam profiles PF02518: ATPase, histidine kinase-, DNA gyrase B-, and HSP90-like domain protein, PF00183: Hsp90 protein                        |
| At1g49630 | chloroplasts | peptidase M16 family protein / insulinase family protein  contains Pfam domain, PF05193: Peptidase M16 inactive domain                                                                                                                                                   |
| At4g10470 | chloroplasts | expressed protein                                                                                                                                                                                                                                                        |
| At5g17660 | chloroplasts | expressed protein  contains Pfam profile PF02390: Putative methyltransferase                                                                                                                                                                                             |
| At2g40690 | other        | NAD-dependent glycerol-3-phosphate dehydrogenase family protein  low similarity to SPIQ26756 Glycerol-3-phosphate dehydrogenase (NAD+), glycosomal (EC 1.1.1.8) { <i>Trypanosoma brucei rhodesiense</i> }; contains Pfam profile PF01210: NAD-dependent glycerol-3-phosp |
| At3g09150 | chloroplasts | phytochromobilin:ferredoxin oxidoreductase, chloroplast / phytochromobilin synthase (HY2)  identical to SPIQ9SR43 Phytochromobilin:ferredoxin oxidoreductase, chloroplast precursor (EC 1.3.7.4) (Phytochromobilin synthase) (PFB synthase) (PPhiB synthase)             |
| At4g39460 | chloroplasts | AtSAMT1; plastidic S-adenosylmethionine transporter                                                                                                                                                                                                                      |
| At3g13470 | chloroplasts | chaperonin 60 beta, putative very similar to GB:JT0901 from [ <i>Arabidopsis thaliana</i> ] (Gene 111 (2), 175-181 (1992))                                                                                                                                               |
| At1g50575 | chloroplasts | lysine decarboxylase family protein  contains Pfam profile PF03641: lysine decarboxylase family                                                                                                                                                                          |
| At2g43630 | chloroplasts | expressed protein                                                                                                                                                                                                                                                        |

|           |                   |                                                                                                                                                                               |
|-----------|-------------------|-------------------------------------------------------------------------------------------------------------------------------------------------------------------------------|
| At3g49560 | other             | mitochondrial import inner membrane translocase subunit Tim17/Tim22/Tim23 family protein contains Pfam PF02466: Mitochondrial import inner membrane translocase subunit Tim17 |
| At1g04110 | secretory pathway | subtilisin-like serine protease, putative contains similarity to subtilisin-like protease GI:3687307 from [ <i>Lycopersicon esculentum</i> ]                                  |
| At4g26520 | other             | fructose-bisphosphate aldolase, cytoplasmic identical to SPIP22197 Fructose-bisphosphate aldolase, cytoplasmic isozyme (EC 4.1.2.13) { <i>Arabidopsis thaliana</i> }          |
| At3g10840 | mitochondria      | hydrolase, alpha/beta fold family protein                                                                                                                                     |
| At2g18940 | chloroplasts      | pentatricopeptide (PPR) repeat-containing protein contains Pfam profile: PF01535 PPR repeat                                                                                   |
| At1g78180 | other             | mitochondrial substrate carrier family protein contains Pfam profile: PF00153 mitochondrial carrier protein                                                                   |
